# Supplementary material
Source: MDPI journal article supplement (https://www.mdpi.com/2073-8994/16/2/178)
Supplement: s1 [file s1]

## Supplementary Materials

### Preference of $C_{2v}$ symmetry in low-spin hexacarbonyls of rare-earth and f elements

Attila Kovács<sup>1,\*</sup> and Werner Klotzbücher<sup>2,3</sup>

- 1,\* European Commission, Joint Research Centre (JRC), Karlsruhe, Germany; ORCID: 0000-0001-8169-3547. Correspondence: attila.kovacs@ec.europa.eu
- 2 Former Max Planck Institute for Radiation Chemistry, 45470 Mülheim a.d. Ruhr, Stiftstrasse 34-36, Germany
- 3 Current address: ICCK Information & Communication Consulting Dr. Klotzbücher, Windmühlenstraße 55, 45470 Mülheim an der Ruhr, Germany; [werner@icck.eu](mailto:werner@icck.eu)

Table S1.  $\langle \hat{S}^2 \rangle$  eigenvalues, PBE0 and CASPT2 relative energies

Table S2. Computed M-C bond distances of the  $M(CO)_6$  complexes and the effective ionic radii of hexa-coordinated  $M^{3+}$ .

Table S3. Selected C-M-C bond angles of the optimized  $M(CO)_6$   $C_{2v}$  structures.

Table S4. DFT steric energies from Shubin Liu's energy decomposition analysis.

Table S5. Compilation of selected calculated and experimental vibrational data.

Figure S1. Structures of the heptet  $C_2$  and singlet  $C_{2h}$  species of the  $U(CO)_6$  complex.

Figure S2. Infrared spectrum of the matrix obtained after cocondensation of Sc atoms with a CO:Ar = 1:10 mixture at 10K.

Figure S3. UV-vis spectrum of the matrix obtained after cocondensation of Sc atoms with a CO:Ar = 1:10 mixture at 10K.

Figure S4. Bonding molecular orbitals of the quintet  $C_{2v}$  species of  $U(CO)_6$ .

Cartesian coordinates of the optimized structures and their B3LYP-D3/TZ electronic energies

### References

1. Slater, J.C. Atomic Radii in Crystals. *J. Chem. Phys.* 2004, 41, 3199-3204, doi:10.1063/1.1725697.
2. Shannon, R.D. Revised Effective Ionic Radii and Systematic Studies of Interatomic Distances in Halides and Chalcogenides. *Acta Cryst.* 1976, A32, 751-767, doi:10.1107/S0567739476001551.
3. Fang, D.; Piquemal, J.-P.; Liu, S.; Cisneros, G.A. DFT-steric-based energy decomposition analysis of intermolecular interactions. *Theor. Chem. Acc.* 2014, 133, 1484, doi:10.1007/s00214-014-1484-7.
4. Wang, C.; Tian, C.-Y.; Zhao, Y.; Jiang, S.; Wang, T.; Zheng, H.; Yan, W.; Li, G.; Xie, H.; Li, J., et al. Observation of Confinement-Free Neutral Group Three Transition Metal Carbonyls  $Sc(CO)_7$  and  $TM(CO)_8$  (TM=Y, La). *Angew. Chem. Int. Ed.* 2023, 62, e202305490, doi:10.1002/anie.202305490.
5. Zhou, M.; Andrews, L. Matrix Infrared Spectra and Density Functional Calculations of  $ScCO$ ,  $ScCO^-$ , and  $ScCO^+$ . *J. Phys. Chem. A* 1999, 103, 2964-2971, doi:10.1021/jp984595k.

Table S1. Theoretical  $\langle \hat{S}^2 \rangle$  eigenvalues (au) compared with the calculated ones (before annihilation) of the minimum structures from B3LYP geometry optimizations, relative energies (kJ/mol) from PBE0 geometry optimizations and CASPT2 single-point calculations.<sup>a</sup>

| Complex             | Spin | B3LYP                                      |                             | PBE0       | CASPT2     |
|---------------------|------|--------------------------------------------|-----------------------------|------------|------------|
|                     |      | $\langle \hat{S}^2 \rangle_{\text{theor}}$ | $\langle \hat{S}^2 \rangle$ | $\Delta E$ | $\Delta E$ |
| Sc(CO) <sub>6</sub> | 2    | 0.75                                       | 0.76                        | 2.0        | 0.0        |
|                     | 4    | 3.75                                       | 3.75                        | 0.0        | 1.2        |
| Lu(CO) <sub>6</sub> | 2    | 0.75                                       | 0.76                        | 0.0        | 0.0        |
|                     | 4    | 3.75                                       | 3.75                        | 9.4        | 27.1       |
| Y(CO) <sub>6</sub>  | 2    | 0.75                                       | 0.76                        | 0.0        | 0.0        |
|                     | 4    | 3.75                                       | 3.75                        | 14.2       | 22.9       |
| U(CO) <sub>6</sub>  | 5    | 6.00                                       | 6.02                        | 0.0        | 0.0        |
|                     | 7    | 12.00                                      | 12.01                       | 34.7       | 44.6       |
| La(CO) <sub>6</sub> | 2    | 0.75                                       | 0.75                        | 0.0        | 0.0        |
|                     | 4    | 3.75                                       | 3.75                        | 36.0       | 35.2       |
| Ac(CO) <sub>6</sub> | 2    | 0.75                                       | 0.75                        | 0.0        | 0.0        |
|                     | 4    | 3.75                                       | 3.75                        | 41.1       | 65.0       |

<sup>a</sup>For computational details, see this section in the main manuscript.

Table S2. Computed (B3LYP) M-C bond distances (Å) of the M(CO)<sub>6</sub> complexes, empirical radii of neutral M [1] and the effective ionic radii of hexa-coordinated M<sup>3+</sup> [2].

| M  | r <sub>M</sub> | r <sub>M3+</sub> | Structure <sup>a</sup>      |                                   |                                   |                                   |                                   |
|----|----------------|------------------|-----------------------------|-----------------------------------|-----------------------------------|-----------------------------------|-----------------------------------|
|    |                |                  | <sup>H</sup> O <sub>h</sub> | <sup>L</sup> C <sub>2v</sub> (eq) | <sup>L</sup> C <sub>2v</sub> (ax) | <sup>L</sup> D <sub>4h</sub> (eq) | <sup>L</sup> D <sub>4h</sub> (ax) |
| Sc | 1.60           | 0.745            | 2.295                       | 2.281                             | 2.251                             | 2.296                             | 2.292                             |
| Lu | 1.75           | 0.861            | 2.382                       | 2.375                             | 2.334                             | 2.384                             | 2.379                             |
| Y  | 1.80           | 0.9              | 2.467                       | 2.457                             | 2.408                             | 2.467                             | 2.462                             |
| U  | 1.75           | 1.025            | 2.501                       | 2.481                             | 2.377                             | 2.552                             | 2.513                             |
| La | 1.95           | 1.032            | 2.677                       | 2.663                             | 2.552                             | 2.678                             | 2.671                             |
| Ac | 1.95           | 1.12             | 2.767                       | 2.767/<br>2.746                   | 2.631                             | 2.758                             | 2.756                             |

<sup>a</sup>The high- and low-spin states of the structures are indicated by the superscripts H and L, respectively. Here, they mean the spin multiplicities 7 and 5, respectively, for U(CO)<sub>6</sub>, whereas 4 and 2 are for the other complexes. The low-spin structure of Ac(CO)<sub>6</sub> is a distorted C<sub>2v</sub> (to C<sub>s</sub>), hence the two equatorial Ac-C bond distances.

Table S3. Selected C-M-C bond angles (deg) of the optimized M(CO)<sub>6</sub> C<sub>2v</sub> structures. For the numbering of C atoms see Figure 1b.

| Complex             | C <sub>3</sub> -M-C <sub>5</sub> | C <sub>1</sub> -M-C <sub>2</sub> |
|---------------------|----------------------------------|----------------------------------|
| Sc(CO) <sub>6</sub> | 154.3                            | 75.7                             |
| Lu(CO) <sub>6</sub> | 157.1                            | 75.0                             |
| Y(CO) <sub>6</sub>  | 162.8                            | 73.8                             |
| U(CO) <sub>6</sub>  | 186.6 <sup>a</sup>               | 67.1                             |
| La(CO) <sub>6</sub> | 181.4 <sup>a</sup>               | 68.6                             |
| Ac(CO) <sub>6</sub> | 186.4 <sup>a</sup>               | 66.9                             |

<sup>a</sup>In these complexes with large metals, the equatorial CO groups are slightly bent towards the axial ones.

Table S4. DFT steric energies from Shubin Liu's energy decomposition analysis [3].

| <b>Structure</b>                       | <b>Sc(CO)<sub>6</sub></b> | <b>Lu(CO)<sub>6</sub></b> | <b>Y(CO)<sub>6</sub></b> | <b>La(CO)<sub>6</sub></b> |
|----------------------------------------|---------------------------|---------------------------|--------------------------|---------------------------|
| <sup>2</sup> C <sub>2v</sub> (hartree) | 948.287364                | 10003.84775               | 2296.810474              | 5348.494464               |
| <sup>2</sup> D <sub>4h</sub> (hartree) | 948.537476                | 10004.07965               | 2297.067027              | 5348.87106                |
| <sup>4</sup> O <sub>h</sub> (hartree)  | 948.546654                | 10004.08852               | 2297.076154              | 5348.885153               |
| ΔE <sub>2D4h-2C2v</sub> (kJ/mol)       | 656.7                     | 608.8                     | 673.6                    | 988.8                     |
| ΔE <sub>4Oh-2C2v</sub> (kJ/mol)        | 680.8                     | 632.1                     | 697.5                    | 1025.8                    |

  

| <b>Structure</b>                       | <b>U(CO)<sub>6</sub></b> | <b>Structure</b>                  | <b>Ac(CO)<sub>6</sub></b> |
|----------------------------------------|--------------------------|-----------------------------------|---------------------------|
| <sup>5</sup> C <sub>2v</sub> (hartree) | 30824.97396              | <sup>2</sup> C <sub>s</sub> (au)  | 24265.53268               |
| <sup>5</sup> D <sub>4h</sub> (hartree) | 30825.73744              | <sup>2</sup> C <sub>2h</sub> (au) | 24265.75592               |
| <sup>7</sup> O <sub>h</sub> (hartree)  | 30825.73659              | <sup>4</sup> O <sub>h</sub> (au)  | 24265.91645               |
| <sup>7</sup> C <sub>3v</sub> (hartree) | 30825.50125              |                                   |                           |
| <sup>3</sup> C <sub>s</sub> (hartree)  | 30824.64677              |                                   |                           |
| ΔE <sub>5D4h-5C2v</sub> (kJ/mol)       | 2004.5                   | ΔE <sub>2C2h-2Cs</sub> (kJ/mol)   | 586.1                     |
| ΔE <sub>7Oh-5C2v</sub> (kJ/mol)        | 2002.3                   | ΔE <sub>4Oh-2Cs</sub> (kJ/mol)    | 1007.6                    |
| ΔE <sub>7C3v-5C2v</sub> (kJ/mol)       | 1384.4                   |                                   |                           |
| ΔE <sub>3Cs-5C2v</sub> (kJ/mol)        | -859.0                   |                                   |                           |

Table S5. Compilation of selected calculated<sup>a</sup> and experimental vibrational data.

| Structure                                     | Sc(CO) <sub>8</sub>          | Sc(CO) <sub>7</sub>                              | Sc(CO) <sub>6</sub>         | Sc(CO) <sub>5</sub>          | Sc(CO) <sub>4</sub>          | Sc(CO) <sub>3</sub>          |
|-----------------------------------------------|------------------------------|--------------------------------------------------|-----------------------------|------------------------------|------------------------------|------------------------------|
| Spin state/symmetry                           | <sup>2</sup> D <sub>4h</sub> | <sup>2</sup> C <sub>2v</sub>                     | <sup>4</sup> O <sub>h</sub> | <sup>4</sup> C <sub>4v</sub> | <sup>4</sup> C <sub>2v</sub> | <sup>4</sup> C <sub>3v</sub> |
| <b>Calculated frequency (cm<sup>-1</sup>)</b> | 1979, 1976                   | 1996, 1980, 1972, 1967, 1964                     | 1960                        | 2x1939, 1917                 | 1920, 1893                   | 2x1864                       |
| IR intensity (km/mol)                         | 2838, 2x2723                 | 930, 964, 2942, 1582, 1423                       | 3x2974                      | 2x3747, 1270                 | 3642, 2158                   | 2x2052                       |
| <b>Deposition CO/Ar = 1/10</b>                | 1984 w                       | 1998 w, 1966 m                                   | 1955 s                      | 1930 w                       | 1930 w, 1890 w               | 1866 w                       |
| UV irradi at 404 nm                           | incr                         | -                                                | incr                        | -                            | -                            | -                            |
| UV irradi at 289 nm                           | -                            | loss                                             | incr                        | -                            | -                            | loss                         |
| Annealed to 25 K                              | incr                         | incr                                             | incr                        | loss                         | loss                         | loss                         |
| <b>Deposition Neat CO (1)</b>                 | 1982 s                       | ~2000 br, ~1960 sh                               | 1952 s                      | 1940 m                       |                              |                              |
| Annealed to 22 K                              | slight decr                  | growth of 2002 w, 1978 w, 1971 w, 1966 w, 1961 w | slight decr                 | slight growth                |                              |                              |
| UV irradi at 495 nm at 10 K                   | -                            | --                                               | -                           | -                            |                              |                              |
| <b>Deposition Neat CO (2)</b>                 | 1982 s                       | ~2000 br, ~1960 sh                               | 1952 s                      | 1940 m                       |                              |                              |
| UV irradi at 420 nm                           | -                            |                                                  | loss                        | loss                         |                              |                              |
| <b>Literature exp. data</b>                   |                              |                                                  |                             |                              |                              |                              |
| IR gas [4]                                    |                              | 2082 w, 1992 m, 1978 sh, 1970 s                  |                             |                              |                              |                              |
| IR Ar or Ne matrix [5]                        |                              |                                                  |                             |                              | 1893, 1884                   | 1865                         |

<sup>a</sup>Calculated at the B3LYP-D3/TZP level (for details see section Computational Details in the text). The calculated frequencies are scaled by 0.96, and the IR intensities are unscaled.

#### Comments:

The calculated (scaled) vibrational data are generally in good agreement with the experimental observations and thus support the presence of all Sc(CO)<sub>x</sub> species with x= 3-8 in the matrix with 10% CO in argon. As expected, upon irradiation and annealing, the species with x=8-6 generally increase, and the lower coordinated species vanish. In neat CO, the spectrum is dominated by the Sc(CO)<sub>6</sub> feature, but minor amounts of Sc(CO)<sub>8</sub> and Sc(CO)<sub>5</sub> are clearly present.

The UV-vis spectrum exhibits in neat and diluted CO matrices a band centred at 380 nm, which we assign mostly to Sc(CO)<sub>6</sub>.

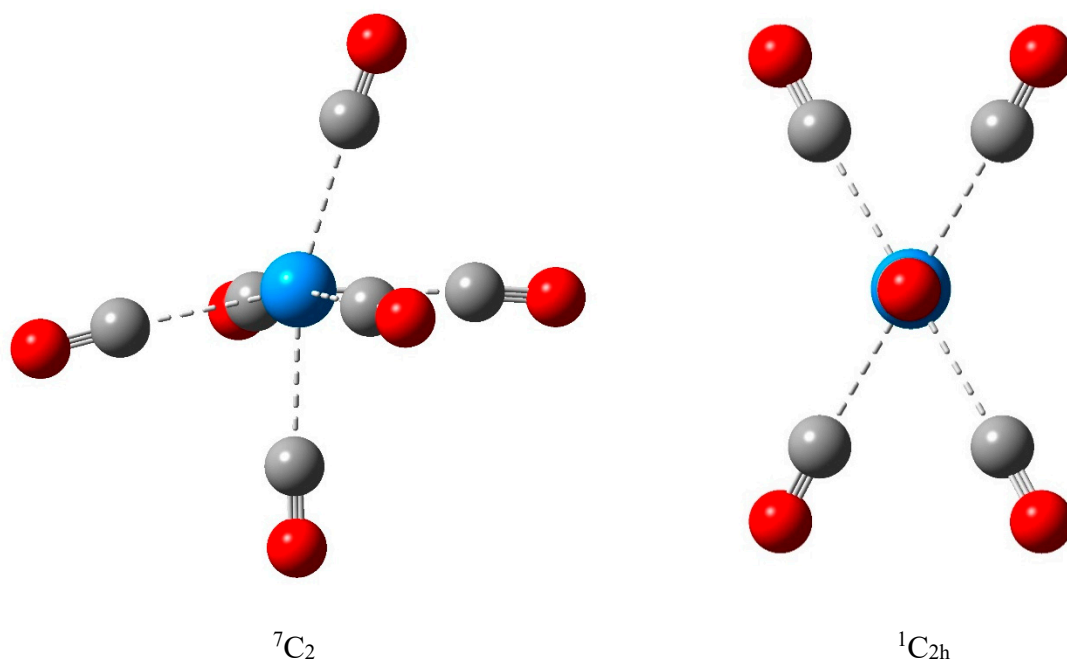

Figure S1. Structures of the heptet  $\text{C}_2$  and singlet  $\text{C}_{2h}$  species of the  $\text{U(CO)}_6$  complex.

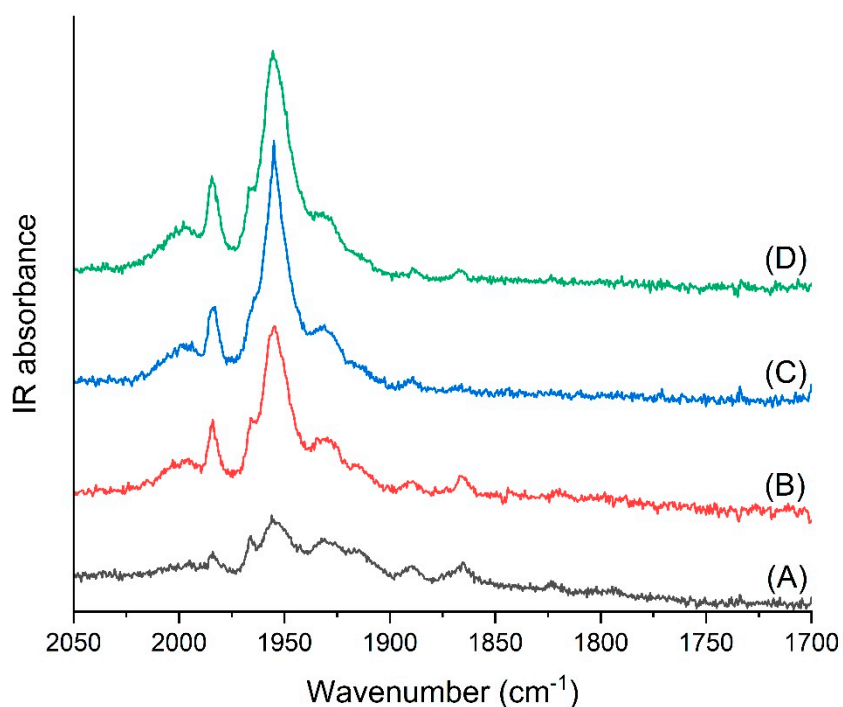

Figure S2. Infrared spectrum of the matrix obtained after cocondensation of Sc atoms with a CO:Ar = 1:10 mixture at 10K: (A) deposition; (B) result of 5 min irradiation at 404 nm; (C) spectrum after a subsequent 7 min irradiation at 289 nm; (D) spectrum after a further 5 min broadband irradiation.

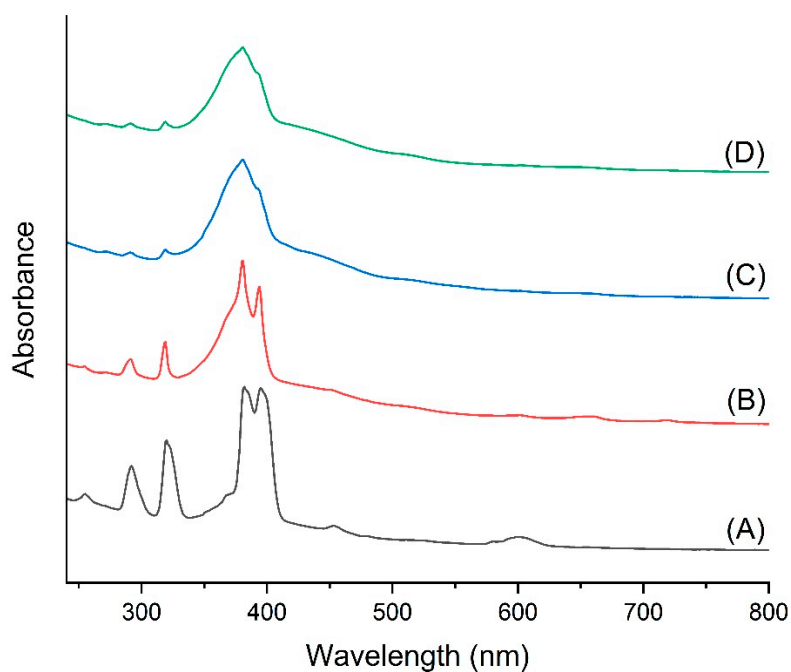

Figure S3. UV-vis spectrum of the matrix obtained after cocondensation of Sc atoms with a CO:Ar = 1:10 mixture at 10K: (A) deposition, indicating the presence of both isolated and coordinated Sc atoms; (B) result of 5 min irradiation at 404 nm, demonstrating loss of the isolated Sc atoms and growth of coordinated species; (C) spectrum after a subsequent 7 min irradiation at 289 nm; (D) spectrum after a further 5 min broad band irradiation.

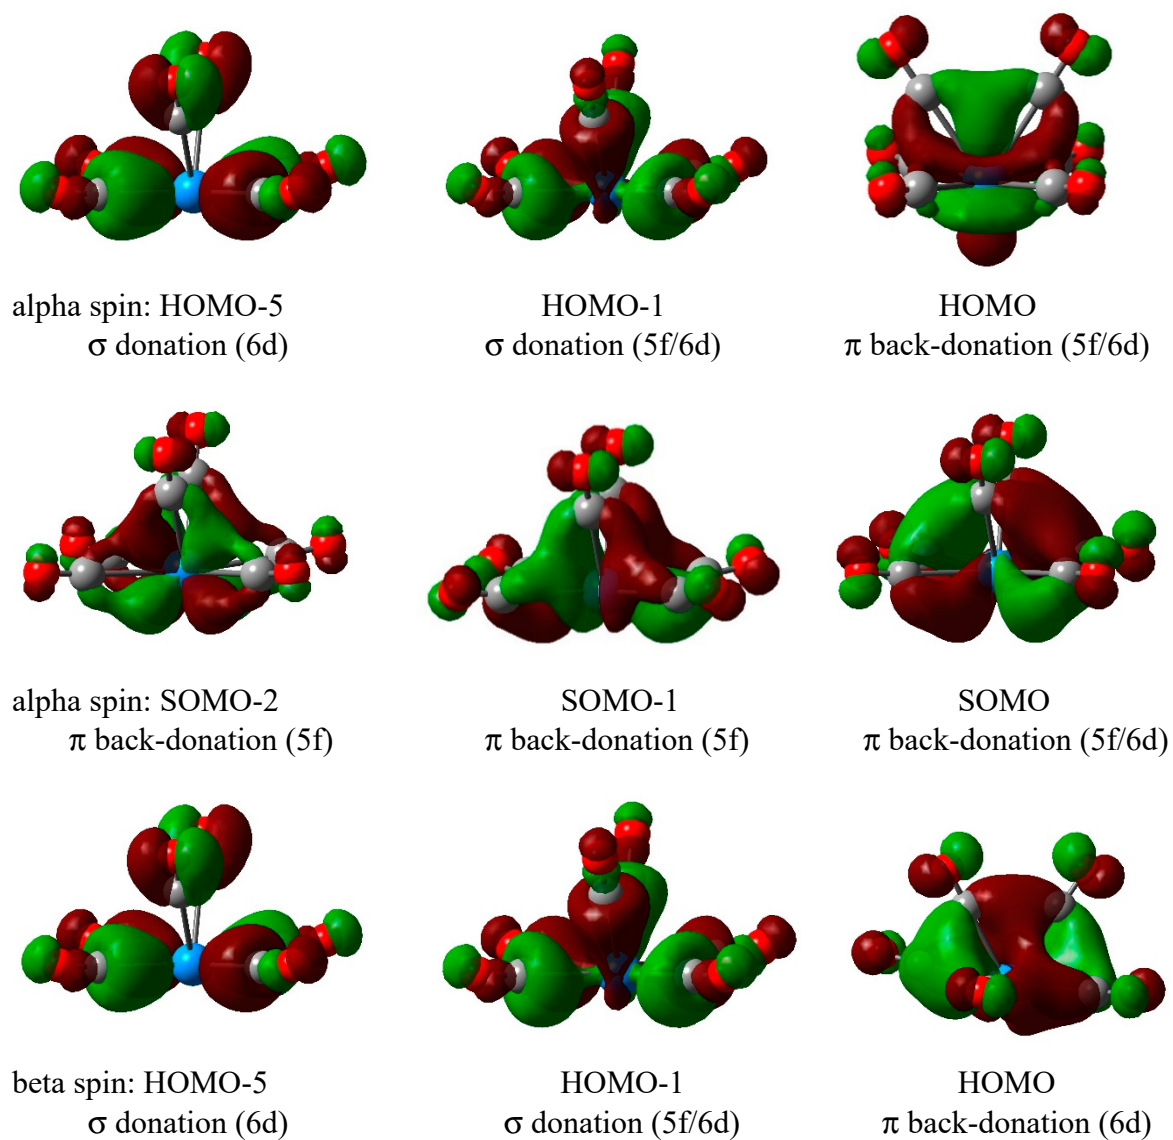

Figure S4. Bonding molecular orbitals of the quintet  $C_{2v}$  global minimum of  $U(CO)_6$  using an isovalue of  $0.03 \text{ (electrons/Bohr}^3)^{1/2}$ .

**Cartesian coordinates (Å) of the  
optimized structures and B3LYP-  
D3/TZP electronic energies**

**Sc(CO)<sub>6</sub> <sup>4</sup>O<sub>h</sub>**

E= -1440.998345 hartree

|    |             |             |             |
|----|-------------|-------------|-------------|
| Sc | 0.00000000  | 0.00000000  | 0.00000000  |
| C  | 0.00000000  | 0.00000000  | 2.29505400  |
| C  | 0.00000000  | 2.29505400  | 0.00000000  |
| C  | -2.29505400 | 0.00000000  | 0.00000000  |
| C  | 2.29505400  | 0.00000000  | 0.00000000  |
| C  | 0.00000000  | -2.29505400 | 0.00000000  |
| C  | 0.00000000  | 0.00000000  | -2.29505400 |
| O  | 0.00000000  | 0.00000000  | 3.43358100  |
| O  | 0.00000000  | 3.43358100  | 0.00000000  |
| O  | 3.43358100  | 0.00000000  | 0.00000000  |
| O  | 0.00000000  | -3.43358100 | 0.00000000  |
| O  | -3.43358100 | 0.00000000  | 0.00000000  |
| O  | 0.00000000  | 0.00000000  | -3.43358100 |

**Sc(CO)<sub>6</sub> <sup>2</sup>D<sub>4h</sub>**

E= -1440.994172 hartree

|    |             |             |             |
|----|-------------|-------------|-------------|
| Sc | 0.00000000  | 0.00000000  | 0.00000000  |
| C  | 0.00000000  | 0.00000000  | 2.29166800  |
| C  | 0.00000000  | 2.29571000  | 0.00000000  |
| C  | -2.29571000 | 0.00000000  | 0.00000000  |
| C  | 2.29571000  | 0.00000000  | 0.00000000  |
| C  | 0.00000000  | -2.29571000 | 0.00000000  |
| C  | 0.00000000  | 0.00000000  | -2.29166800 |
| O  | 0.00000000  | 0.00000000  | 3.43048400  |
| O  | 0.00000000  | 3.43431800  | 0.00000000  |
| O  | 3.43431800  | 0.00000000  | 0.00000000  |
| O  | 0.00000000  | -3.43431800 | 0.00000000  |
| O  | -3.43431800 | 0.00000000  | 0.00000000  |
| O  | 0.00000000  | 0.00000000  | -3.43048400 |

**Sc(CO)<sub>6</sub> <sup>2</sup>C<sub>2v</sub>**

E= -1440.995090 hartree

|    |             |             |             |
|----|-------------|-------------|-------------|
| Sc | 0.00000000  | 0.00000000  | -0.27586701 |
| C  | -1.50387093 | -1.63891379 | -0.78243531 |
| C  | -1.50387093 | 1.63891379  | -0.78243531 |
| C  | 1.50387093  | 1.63891379  | -0.78243531 |
| C  | -1.38078015 | 0.00000000  | 1.50127185  |
| C  | 1.50387093  | -1.63891379 | -0.78243531 |
| C  | 1.38078015  | 0.00000000  | 1.50127185  |
| O  | -2.27040591 | -2.45034876 | -1.00876746 |
| O  | -2.27040591 | 2.45034876  | -1.00876746 |
| O  | -2.10272224 | 0.00000000  | 2.38653977  |
| O  | 2.27040591  | -2.45034876 | -1.00876746 |
| O  | 2.27040591  | 2.45034876  | -1.00876746 |
| O  | 2.10272224  | 0.00000000  | 2.38653977  |

**Lu(CO)<sub>6</sub> <sup>4</sup>O<sub>h</sub>**

E= -1916.543809 hartree

|    |             |             |             |
|----|-------------|-------------|-------------|
| Lu | 0.00000000  | 0.00000000  | 0.00000000  |
| C  | 0.00000000  | 0.00000000  | 2.38180600  |
| C  | 0.00000000  | 2.38180600  | 0.00000000  |
| C  | -2.38180600 | 0.00000000  | 0.00000000  |
| C  | 2.38180600  | 0.00000000  | 0.00000000  |
| C  | 0.00000000  | -2.38180600 | 0.00000000  |
| C  | 0.00000000  | 0.00000000  | -2.38180600 |
| O  | 0.00000000  | 0.00000000  | 3.52124300  |
| O  | 0.00000000  | 3.52124300  | 0.00000000  |
| O  | 3.52124300  | 0.00000000  | 0.00000000  |
| O  | 0.00000000  | -3.52124300 | 0.00000000  |
| O  | -3.52124300 | 0.00000000  | 0.00000000  |
| O  | 0.00000000  | 0.00000000  | -3.52124300 |

**Lu(CO)<sub>6</sub> <sup>2</sup>D<sub>4h</sub>**

E= -1916.540312 hartree

|    |             |             |             |
|----|-------------|-------------|-------------|
| Lu | 0.00000000  | 0.00000000  | 0.00000000  |
| C  | 0.00000000  | 0.00000000  | 2.37925800  |
| C  | 0.00000000  | 2.38391300  | 0.00000000  |
| C  | -2.38391300 | 0.00000000  | 0.00000000  |
| C  | 2.38391300  | 0.00000000  | 0.00000000  |
| C  | 0.00000000  | -2.38391300 | 0.00000000  |
| C  | 0.00000000  | 0.00000000  | -2.37925800 |
| O  | 0.00000000  | 0.00000000  | 3.51920900  |
| O  | 0.00000000  | 3.52336400  | 0.00000000  |
| O  | 3.52336400  | 0.00000000  | 0.00000000  |
| O  | 0.00000000  | -3.52336400 | 0.00000000  |
| O  | -3.52336400 | 0.00000000  | 0.00000000  |
| O  | 0.00000000  | 0.00000000  | -3.51920900 |

**Lu(CO)<sub>6</sub> <sup>2</sup>C<sub>2v</sub>**

E= -1916.544859 hartree

|    |             |             |             |
|----|-------------|-------------|-------------|
| Lu | 0.00000000  | 0.00000000  | 0.21416100  |
| C  | 1.72554500  | 1.56271500  | 0.68591000  |
| C  | -1.72554500 | 1.56271500  | 0.68591000  |
| C  | -1.72554500 | -1.56271500 | 0.68591000  |
| C  | 0.00000000  | 1.42079600  | -1.63789600 |
| C  | 1.72554500  | -1.56271500 | 0.68591000  |
| C  | 0.00000000  | -1.42079600 | -1.63789600 |
| O  | 2.55409800  | 2.31767600  | 0.89216700  |
| O  | -2.55409800 | 2.31767600  | 0.89216700  |
| O  | 0.00000000  | 2.12893000  | -2.53511500 |
| O  | 2.55409800  | -2.31767600 | 0.89216700  |
| O  | -2.55409800 | -2.31767600 | 0.89216700  |
| O  | 0.00000000  | -2.12893000 | -2.53511500 |



**Y(CO)<sub>6</sub> <sup>4</sup>O<sub>h</sub>**

E= -718.574517 hartree

|   |             |             |             |
|---|-------------|-------------|-------------|
| Y | 0.00000000  | 0.00000000  | 0.00000000  |
| C | 0.00000000  | 0.00000000  | 2.46644500  |
| C | 0.00000000  | 2.46644500  | 0.00000000  |
| C | -2.46644500 | 0.00000000  | 0.00000000  |
| C | 2.46644500  | 0.00000000  | 0.00000000  |
| C | 0.00000000  | -2.46644500 | 0.00000000  |
| C | 0.00000000  | 0.00000000  | -2.46644500 |
| O | 0.00000000  | 0.00000000  | 3.60519800  |
| O | 0.00000000  | 3.60519800  | 0.00000000  |
| O | 3.60519800  | 0.00000000  | 0.00000000  |
| O | 0.00000000  | -3.60519800 | 0.00000000  |
| O | -3.60519800 | 0.00000000  | 0.00000000  |
| O | 0.00000000  | 0.00000000  | -3.60519800 |

**Y(CO)<sub>6</sub> <sup>2</sup>C<sub>2v</sub>**

E= -718.576748 hartree

|   |             |             |             |
|---|-------------|-------------|-------------|
| Y | 0.00000000  | 0.00000000  | -0.34925909 |
| C | -1.59429175 | -1.83331055 | -0.71653843 |
| C | -1.59429175 | 1.83331055  | -0.71653843 |
| C | 1.59429175  | 1.83331055  | -0.71653843 |
| C | -1.44496831 | 0.00000000  | 1.57681938  |
| C | 1.59429175  | -1.83331055 | -0.71653843 |
| C | 1.44496831  | 0.00000000  | 1.57681938  |
| O | -2.34066812 | -2.68145628 | -0.86404712 |
| O | -2.34066812 | 2.68145628  | -0.86404712 |
| O | -2.15169902 | 0.00000000  | 2.47406361  |
| O | 2.34066812  | -2.68145628 | -0.86404712 |
| O | 2.34066812  | 2.68145628  | -0.86404712 |
| O | 2.15169902  | 0.00000000  | 2.47406361  |

**U(CO)<sub>6</sub> <sup>7</sup>C<sub>2</sub>**

E= -1157.193274 hartree

|   |             |             |             |
|---|-------------|-------------|-------------|
| U | 0.00000000  | 0.00000000  | 0.16548300  |
| C | 2.03269900  | -0.72434700 | 1.47412300  |
| C | 0.00000000  | 2.48503700  | -0.12035200 |
| C | -2.03269900 | 0.72434700  | 1.47412300  |
| C | 1.69330900  | -0.37551600 | -1.60590400 |
| C | 0.00000000  | -2.48503700 | -0.12035200 |
| C | -1.69330900 | 0.37551600  | -1.60590400 |
| O | 2.97520200  | -1.07576800 | 2.01176500  |
| O | -0.00137900 | 3.60981100  | -0.31406000 |
| O | 2.43663500  | -0.52460900 | -2.46013200 |
| O | 0.00137900  | -3.60981100 | -0.31406000 |
| O | -2.97520200 | 1.07576800  | 2.01176500  |
| O | -2.43663500 | 0.52460900  | -2.46013200 |

**U(CO)<sub>6</sub> <sup>5</sup>C<sub>2v</sub>**

E= -1157.201765 hartree

|   |             |             |             |
|---|-------------|-------------|-------------|
| U | 0.00000000  | 0.00000000  | 0.47348600  |
| C | 1.98650600  | 1.47954900  | 0.32996700  |
| C | -1.98650600 | 1.47954900  | 0.32996700  |
| C | -1.98650600 | -1.47954900 | 0.32996700  |
| C | 0.00000000  | 1.31338700  | -1.50725100 |
| C | 1.98650600  | -1.47954900 | 0.32996700  |
| C | 0.00000000  | -1.31338700 | -1.50725100 |
| O | 2.89361800  | 2.15952300  | 0.18786000  |
| O | -2.89361800 | 2.15952300  | 0.18786000  |
| O | 0.00000000  | 1.94800900  | -2.46277400 |
| O | 2.89361800  | -2.15952300 | 0.18786000  |
| O | -2.89361800 | -2.15952300 | 0.18786000  |
| O | 0.00000000  | -1.94800900 | -2.46277400 |

**U(CO)<sub>6</sub> <sup>3</sup>C<sub>s</sub>**

E= -1157.197049 hartree

|   |             |             |             |
|---|-------------|-------------|-------------|
| U | -0.52130777 | 0.00911187  | 0.00000000  |
| C | -0.30331320 | -1.97545136 | 1.36359464  |
| C | -0.24857506 | 2.05536663  | 1.43501032  |
| C | -0.24857506 | 2.05536663  | -1.43501032 |
| C | 1.44311892  | -0.06280340 | 1.19355241  |
| C | -0.30331320 | -1.97545136 | -1.36359464 |
| C | 1.44311892  | -0.06280340 | -1.19355241 |
| O | -0.10021440 | -2.91718447 | 1.98073754  |
| O | 0.00110081  | 2.96354351  | 2.07637253  |
| O | 2.43018276  | -0.11010754 | 1.78572065  |
| O | -0.10021440 | -2.91718447 | -1.98073754 |
| O | 0.00110081  | 2.96354351  | -2.07637253 |
| O | 2.43018276  | -0.11010754 | -1.78572065 |

**U(CO)<sub>6</sub> <sup>1</sup>C<sub>2h</sub>**

E= -1157.166108 hartree

|   |             |             |             |
|---|-------------|-------------|-------------|
| U | 0.00000000  | 0.00000000  | 0.00000000  |
| C | -0.97377469 | -0.92278984 | 2.06885679  |
| C | -0.74936383 | 2.40349399  | 0.00000000  |
| C | -0.97377469 | -0.92278984 | -2.06885679 |
| C | 0.97377469  | 0.92278984  | 2.06885679  |
| C | 0.74936383  | -2.40349399 | 0.00000000  |
| C | 0.97377469  | 0.92278984  | -2.06885679 |
| O | -1.38353328 | -1.34658651 | 3.05035086  |
| O | -1.06105503 | 3.49930452  | 0.00000000  |
| O | 1.38353328  | 1.34658651  | 3.05035086  |
| O | 1.06105503  | -3.49930452 | 0.00000000  |
| O | -1.38353328 | -1.34658651 | -3.05035086 |
| O | 1.38353328  | 1.34658651  | -3.05035086 |

**La(CO)<sub>6</sub> <sup>4</sup>O<sub>h</sub>**

E= -1115.879512 hartree

|    |             |             |             |
|----|-------------|-------------|-------------|
| La | 0.00000000  | 0.00000000  | 0.00000000  |
| C  | 0.00000000  | 0.00000000  | 2.67677300  |
| C  | 0.00000000  | 2.67677300  | 0.00000000  |
| C  | -2.67677300 | 0.00000000  | 0.00000000  |
| C  | 2.67677300  | 0.00000000  | 0.00000000  |
| C  | 0.00000000  | -2.67677300 | 0.00000000  |
| C  | 0.00000000  | 0.00000000  | -2.67677300 |
| O  | 0.00000000  | 0.00000000  | 3.81465900  |
| O  | 0.00000000  | 3.81465900  | 0.00000000  |
| O  | 3.81465900  | 0.00000000  | 0.00000000  |
| O  | 0.00000000  | -3.81465900 | 0.00000000  |
| O  | -3.81465900 | 0.00000000  | 0.00000000  |
| O  | 0.00000000  | 0.00000000  | -3.81465900 |

**La(CO)<sub>6</sub> <sup>2</sup>C<sub>2v</sub>**

E= -1115.887798 hartree

|    |             |             |             |
|----|-------------|-------------|-------------|
| La | 0.00000000  | 0.00000000  | 0.55861400  |
| C  | 2.09038400  | 1.64876100  | 0.52483600  |
| C  | -2.09038400 | 1.64876100  | 0.52483600  |
| C  | -2.09038400 | -1.64876100 | 0.52483600  |
| C  | 0.00000000  | 1.43773300  | -1.54977200 |
| C  | 2.09038400  | -1.64876100 | 0.52483600  |
| C  | 0.00000000  | -1.43773300 | -1.54977200 |
| O  | 2.98085900  | 2.35234700  | 0.43551000  |
| O  | -2.98085900 | 2.35234700  | 0.43551000  |
| O  | 0.00000000  | 2.09352000  | -2.48600600 |
| O  | 2.98085900  | -2.35234700 | 0.43551000  |
| O  | -2.98085900 | -2.35234700 | 0.43551000  |
| O  | 0.00000000  | -2.09352000 | -2.48600600 |

**Ac(CO)<sub>6</sub> <sup>4</sup>O<sub>h</sub>**

E= -1055.907118 hartree

|    |             |             |             |
|----|-------------|-------------|-------------|
| Ac | 0.00000000  | 0.00000000  | 0.00000000  |
| C  | 0.00000000  | 0.00000000  | 2.76733700  |
| C  | 0.00000000  | 2.76733700  | 0.00000000  |
| C  | -2.76733700 | 0.00000000  | 0.00000000  |
| C  | 2.76733700  | 0.00000000  | 0.00000000  |
| C  | 0.00000000  | -2.76733700 | 0.00000000  |
| C  | 0.00000000  | 0.00000000  | -2.76733700 |
| O  | 0.00000000  | 0.00000000  | 3.90613500  |
| O  | 0.00000000  | 3.90613500  | 0.00000000  |
| O  | 3.90613500  | 0.00000000  | 0.00000000  |
| O  | 0.00000000  | -3.90613500 | 0.00000000  |
| O  | -3.90613500 | 0.00000000  | 0.00000000  |
| O  | 0.00000000  | 0.00000000  | -3.90613500 |

**Ac(CO)<sub>6</sub> <sup>2</sup>C<sub>2h</sub>**

E= -1055.907000 hartree

|    |             |             |             |
|----|-------------|-------------|-------------|
| Ac | 0.00000000  | 0.00000000  | 0.00000000  |
| C  | 0.00000000  | 1.82884200  | 2.06418800  |
| C  | 0.00000000  | -1.82884200 | 2.06418800  |
| C  | 2.33672300  | -1.46067100 | 0.00000000  |
| C  | -2.33672300 | 1.46067100  | 0.00000000  |
| C  | 0.00000000  | 1.82884200  | -2.06418800 |
| C  | 0.00000000  | -1.82884200 | -2.06418800 |
| O  | -0.07633900 | 2.57275300  | 2.92344500  |
| O  | 0.07633900  | -2.57275300 | 2.92344500  |
| O  | -3.24478100 | 2.14967300  | 0.00000000  |
| O  | -0.07633900 | 2.57275300  | -2.92344500 |
| O  | 3.24478100  | -2.14967300 | 0.00000000  |
| O  | 0.07633900  | -2.57275300 | -2.92344500 |

**Ac(CO)<sub>6</sub> <sup>2</sup>C<sub>s</sub>**

E= -1055.916678 hartree

|    |             |             |             |
|----|-------------|-------------|-------------|
| Ac | 0.52328300  | 0.08079100  | 0.00000000  |
| C  | 0.21661900  | 2.31095300  | 1.60841000  |
| C  | 0.51607300  | -2.17266300 | 1.56949800  |
| C  | 0.51607300  | -2.17266300 | -1.56949800 |
| C  | -1.66766700 | -0.28004700 | 1.41121900  |
| C  | 0.21661900  | 2.31095300  | -1.60841000 |
| C  | -1.66766700 | -0.28004700 | -1.41121900 |
| O  | 0.00220800  | 3.22491600  | 2.25238100  |
| O  | 0.41085600  | -3.12662700 | 2.18362700  |
| O  | -2.62259400 | -0.44137000 | 2.02023800  |
| O  | 0.00220800  | 3.22491600  | -2.25238100 |
| O  | 0.41085600  | -3.12662700 | -2.18362700 |
| O  | -2.62259400 | -0.44137000 | -2.02023800 |

**Sc(CO)<sub>8</sub> <sup>2</sup>D<sub>4h</sub>**

E= -1667.739721 hartree

|    |             |             |             |
|----|-------------|-------------|-------------|
| Sc | 0.00000000  | 0.00000000  | 0.00000000  |
| C  | 0.00000000  | 1.91083600  | 1.39540100  |
| C  | 1.91083600  | 0.00000000  | -1.39540100 |
| C  | 0.00000000  | 1.91083600  | -1.39540100 |
| C  | 1.91083600  | 0.00000000  | 1.39540100  |
| C  | 0.00000000  | -1.91083600 | -1.39540100 |
| C  | -1.91083600 | 0.00000000  | 1.39540100  |
| C  | 0.00000000  | -1.91083600 | 1.39540100  |
| C  | -1.91083600 | 0.00000000  | -1.39540100 |
| O  | 2.81815500  | 0.00000000  | -2.08140400 |
| O  | 0.00000000  | 2.81815500  | 2.08140400  |
| O  | 2.81815500  | 0.00000000  | 2.08140400  |
| O  | 0.00000000  | 2.81815500  | -2.08140400 |
| O  | -2.81815500 | 0.00000000  | 2.08140400  |
| O  | 0.00000000  | -2.81815500 | -2.08140400 |
| O  | -2.81815500 | 0.00000000  | -2.08140400 |
| O  | 0.00000000  | -2.81815500 | 2.08140400  |

**Sc(CO)<sub>7</sub> <sup>2</sup>C<sub>2v</sub>**

E= -1554.377505 hartree

|    |             |             |             |
|----|-------------|-------------|-------------|
| Sc | 0.00000000  | 0.00000000  | 0.02723900  |
| C  | 0.00000000  | 0.00000000  | 2.34393300  |
| C  | -1.83184300 | 1.37270300  | 0.31814400  |
| C  | -1.83184300 | -1.37270300 | 0.31814400  |
| C  | 0.00000000  | -1.34874100 | -1.81460000 |
| C  | 1.83184300  | 1.37270300  | 0.31814400  |
| C  | 1.83184300  | -1.37270300 | 0.31814400  |
| C  | 0.00000000  | 1.34874100  | -1.81460000 |
| O  | 0.00000000  | -2.02775600 | -2.73036900 |
| O  | 2.75609700  | -2.01667100 | 0.47973300  |
| O  | 2.75609700  | 2.01667100  | 0.47973300  |
| O  | -2.75609700 | 2.01667100  | 0.47973300  |
| O  | -2.75609700 | -2.01667100 | 0.47973300  |
| O  | 0.00000000  | 0.00000000  | 3.47982400  |
| O  | 0.00000000  | 2.02775600  | -2.73036900 |

**Sc(CO)<sub>5</sub> <sup>4</sup>C<sub>4v</sub>**

E= -1327.605496 hartree

|    |             |             |             |
|----|-------------|-------------|-------------|
| Sc | 0.00000000  | 0.00000000  | 0.46764800  |
| O  | 0.00000000  | 0.00000000  | -2.88870100 |
| O  | 0.00000000  | 3.42206800  | 0.39001200  |
| O  | 0.00000000  | -3.42206800 | 0.39001200  |
| O  | 3.42206800  | 0.00000000  | 0.39001200  |
| O  | -3.42206800 | 0.00000000  | 0.39001200  |
| C  | -2.28481800 | 0.00000000  | 0.46940800  |
| C  | 0.00000000  | -2.28481800 | 0.46940800  |
| C  | 2.28481800  | 0.00000000  | 0.46940800  |
| C  | 0.00000000  | 0.00000000  | -1.74286400 |
| C  | 0.00000000  | 2.28481800  | 0.46940800  |

**Sc(CO)<sub>4</sub> <sup>4</sup>C<sub>2v</sub>**

E= -1214.214106 hartree

|    |             |             |             |
|----|-------------|-------------|-------------|
| Sc | 0.00000000  | 0.00000000  | 0.79428000  |
| C  | 0.00000000  | 2.25480500  | 0.67617600  |
| C  | 0.00000000  | -2.25480500 | 0.67617600  |
| C  | -1.59673600 | 0.00000000  | -0.71817800 |
| C  | 1.59673600  | 0.00000000  | -0.71817800 |
| O  | 0.00000000  | 3.38396000  | 0.49569700  |
| O  | 0.00000000  | -3.38396000 | 0.49569700  |
| O  | -2.43005600 | 0.00000000  | -1.50668800 |
| O  | 2.43005600  | 0.00000000  | -1.50668800 |

**Sc(CO)<sub>3</sub> <sup>4</sup>C<sub>3v</sub>**

E= -1100.819670 hartree

|    |             |             |             |
|----|-------------|-------------|-------------|
| Sc | 0.00000000  | 0.00000000  | 1.08581500  |
| C  | 0.00000000  | 1.77741800  | -0.16069000 |
| C  | -1.53928900 | -0.88870900 | -0.16069000 |
| C  | 1.53928900  | -0.88870900 | -0.16069000 |
| O  | 0.00000000  | 2.71508500  | -0.82957000 |
| O  | -2.35133300 | -1.35754300 | -0.82957000 |
| O  | 2.35133300  | -1.35754300 | -0.82957000 |
